# Supplementary material for: Carbon quantum dot/mixed crystal TiO2 composites via a hydrogenation process: an efficient photocatalyst for the hydrogen evolution reaction
Source: Royal Society of Chemistry journal article supplement (doi:10.1039/c6ra17597j), 2016-01-01
Supplement: c6ra17597j1.pdf [file c6ra17597j1.pdf]

## Support information

### **Carbon Quantum Dots/Mixed Crystal TiO<sub>2</sub> Composites via Hydrogenating Process: an Efficient Photocatalyst for Hydrogen Evolution Reaction**

Yunqi Tang, Rong Hao, Yu Fu, Yong Jiang, Xiangcheng Zhang, Qingjiang Pan,\*  
Baojiang Jiang\*

Key Laboratory of Functional Inorganic Material Chemistry, Ministry of Education of the People's Republic of China, Heilongjiang University, Harbin 150080, China;

E-mail: panqjtc@163.com; jiangbaojiang88@sina.com

**Table S1.** Amount of brookite phase TiO<sub>2</sub> in xCST-H<sub>2</sub> (x=0.2, 0.5, 1, 3, 5 wt %)

|                               | peak height<br>(at 25.3°, a.u.) | peak height<br>(at 30.8°, a.u.) | relative intensity<br>(vs. peak height) | peak area of<br>brookite (a.u.) | total peak<br>area (a.u.) | relative intensity<br>(vs. peak area) |
|-------------------------------|---------------------------------|---------------------------------|-----------------------------------------|---------------------------------|---------------------------|---------------------------------------|
| 0.2% CST-H <sub>2</sub>       | 1036.17                         | 33.50                           | 3.13%                                   | 18.78                           | 1580.65                   | 1.19%                                 |
| <b>0.5% CST-H<sub>2</sub></b> | <b>1184.06</b>                  | <b>17.89</b>                    | <b>1.45%</b>                            | <b>13.08</b>                    | <b>1772.93</b>            | <b>0.74%</b>                          |
| 1% CST-H <sub>2</sub>         | 883.60                          | 46.41                           | 4.99%                                   | 23.39                           | 1331.23                   | 1.76%                                 |
| 3% CST-H <sub>2</sub>         | 1307.94                         | 48.10                           | 3.54%                                   | 24.98                           | 1712.18                   | 1.46%                                 |
| 5% CST-H <sub>2</sub>         | 1740.27                         | 53.34                           | 2.97%                                   | 24.08                           | 2117.79                   | 1.14%                                 |

**Table S2.** Hydrogen evolution activities of our sample compared with literatures<sup>1-6</sup>.

| Sample                        | Wavelength of irradiation | Photocatalytic activity for H <sub>2</sub> evolution (μmol h <sup>-1</sup> ) | Phase of TiO <sub>2</sub>   | Concentration of catalyst (g/L) | Rate of Photocatalytic activity for H <sub>2</sub> evolution (μmol g <sup>-1</sup> h <sup>-1</sup> ) |
|-------------------------------|---------------------------|------------------------------------------------------------------------------|-----------------------------|---------------------------------|------------------------------------------------------------------------------------------------------|
| Core-shell TiO <sub>2</sub>   | Full spectrum irradiation | 7.192                                                                        | Anatase and rutile          | 0.6                             | 11.99                                                                                                |
| P25-H <sub>2</sub>            | UV                        | 385                                                                          | P25                         | 5.6                             | 68.75                                                                                                |
| GQDs-TiO <sub>2</sub>         | UV-vis                    | 4.126                                                                        | P25                         | 2                               | 2.063                                                                                                |
| CQD-P25                       | UV                        | 9.1                                                                          | P25                         | 2                               | 4.55                                                                                                 |
| <b>0.5% CST-H<sub>2</sub></b> | <b>AM 1.5</b>             | <b>280</b>                                                                   | <b>Brookite and anatase</b> | <b>1</b>                        | <b>280</b>                                                                                           |

**Reference**

1. J. H. Jiang, H. Zhou, F. Zhang, T. X. Fan and D. Zhang, Appl. Surf. Sci., 2016, **368**, 309-315.
2. T. A. Kandiel, A. Feldhoff, L. Robben, R. Dillert, and D. W. Bahnemann, Chem. Mater., 2010, **22**, 2050-2060.
3. F. Amano, M. Nakata, A. Yamamoto and T. Tanaka, Catal. Sci. Technol., 2016, **6**, 5693-5699.
4. X. Q. Hao, Z. L. Jin, J. Xu, S. X. Min and G. X. Lu, Superlattices and Microst., 2016, **94**, 237-244.
5. H. J. Yu, Y. F. Zhao, C. Zhou, L. Shang, Y. Peng, Y. H. Cao, C. H. Tung and T. R. Zhang, J. Mater. Chem. A., 2014, **2**, 3344-3351.
6. J. Tian, Y. H. Leng, Z. H. Zhao, Y. Xia, Y. H. Sang, P. Hao, J. Zhan, M. C. Li, and H. Liu, Nano Energy, 2015, **11**, 419-427.

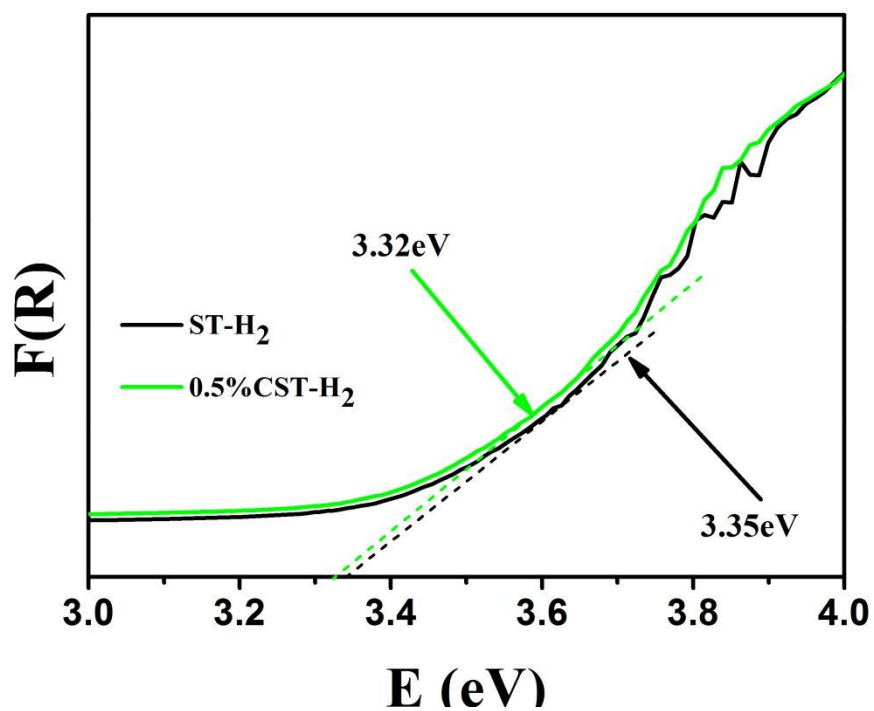

**Fig. S1** Band gap energies of pure ST- $H_2$  and the 0.5% CST- $H_2$  samples.

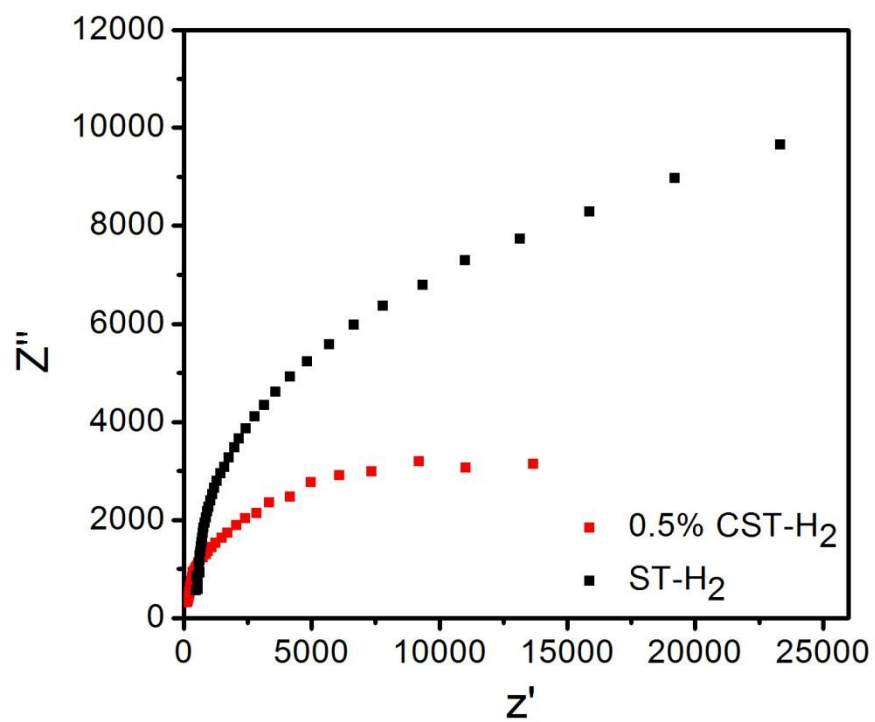

**Fig. S2** Nyquist plots of the EIS data for pure ST- $H_2$  and 0.5% CST- $H_2$  samples.
